# Supplementary material for: A descriptive analysis of the characteristics and the peer review process of systematic review protocols published in an open peer review journal from 2012 to 2017
Source: PubMed Central journal article supplement (PMC6415341; doi:10.1186/s12874-019-0698-8), 2019-03-13
Supplement: 12874_2019_698_MOESM1_ESM.pdf [file 12874_2019_698_MOESM1_ESM.pdf]

**Additional file 1:** Time trends in judgement of level of interest and quality of written English.

| <b>Year</b>                                                     | <b>2012</b> | <b>2013</b> | <b>2014</b> | <b>2015</b> | <b>2016</b> | <b>2017</b> | <b>Overall</b> |
|-----------------------------------------------------------------|-------------|-------------|-------------|-------------|-------------|-------------|----------------|
| Level of interest assessed*                                     | n = 13      | n = 23      | n = 38      | n = 66      | n = 111     | n = 140     | n = 391        |
| Judged to be limited                                            | 0.0%        | 13.0%       | 5.3%        | 7.6%        | 6.3%        | 5.7%        | 6.4%           |
| Quality of written English assessed**                           | n = 13      | n = 23      | n = 39      | n = 71      | n = 112     | n = 140     | n = 398        |
| Judged to be not suitable/ in need of some language corrections | 23.1%       | 21.7%       | 23.1%       | 25.4%       | 25.9%       | 40.7%       | 30.4%          |

\*In the remaining n = 153 there was no reviewer, the reviewer report was missing or the level of interest has not been reported.

\*\* In the remaining n = 146 there was no reviewer, the reviewer report was missing or the quality of written English t has not been reported.
