# Supplementary material for: A descriptive analysis of the characteristics and the peer review process of systematic review protocols published in an open peer review journal from 2012 to 2017
Source: PubMed Central journal article supplement (PMC6415341; doi:10.1186/s12874-019-0698-8), 2019-03-13
Supplement: 12874_2019_698_MOESM2_ESM.pdf [file 12874_2019_698_MOESM2_ESM.pdf]

**Additional file 2:** Time trends in basic and peer-review characteristics and processing times – additional data.

| Year                | 2012<br>(n = 21) | 2013<br>(n = 56) | 2014<br>(n = 92) | 2015<br>(n = 106) | 2016<br>(n = 124) | 2017<br>(n = 145) | Overall<br>(n = 544) |
|---------------------|------------------|------------------|------------------|-------------------|-------------------|-------------------|----------------------|
| Country*            |                  |                  |                  |                   |                   |                   |                      |
| Canada              | 52.4%            | 42.9%            | 39.1%            | 23.4%             | 23.4%             | 29.7%             | 32.2%                |
| UK                  | 23.8%            | 19.6%            | 22.8%            | 33.1%             | 33.1%             | 25.5%             | 26.1%                |
| Other               | 14.3%            | 21.4%            | 17.4%            | 24.2%             | 24.2%             | 31.0%**           | 22.6%                |
| Australia           | 9.5%             | 3.6%             | 5.4%             | 6.5%              | 6.5%              | 6.2%              | 7.4%                 |
| Germany             | 0.0%             | 8.9%             | 7.6%             | 7.3%              | 7.3%              | 3.5%              | 7.0%                 |
| USA                 | 0.0%             | 3.6%             | 7.6%             | 5.7%              | 5.7%              | 4.1%              | 4.8%                 |
| Number of revisions |                  |                  |                  |                   |                   |                   |                      |
| 0                   | 28.6%            | 10.7%            | 10.9%            | 9.4%              | 8.9%              | 4.1%              | 9.0%                 |
| 1                   | 57.1%            | 75.0%            | 63.0%            | 64.2%             | 82.3%             | 75.9%             | 72.1%                |
| 2                   | 9.5%             | 14.3%            | 21.7%            | 25.5%             | 8.9%              | 17.9%             | 17.3%                |
| ≥ 3                 | 4.8%             | 0.0%             | 4.4%             | 0.9%              | 0.0%              | 2.1%              | 1.7%                 |
| Number of reviewers |                  |                  |                  |                   |                   |                   |                      |
| 0                   | 23.8%            | 7.1%             | 8.7%             | 9.4%              | 6.5%              | 2.8%              | 7.2%                 |
| 1                   | 66.7%            | 80.4%            | 70.7%            | 48.1%             | 80.7%             | 40.7%             | 61.4%                |
| 2                   | 9.5%             | 10.7%            | 19.6%            | 34.0%             | 9.7%              | 40.7%             | 24.4%                |
| ≥ 3                 | 0.0%             | 1.8%             | 1.1%             | 8.5%              | 3.2%              | 15.9%             | 7.0%                 |

\*of first author's first affiliation \*\*Of those: Brazil 15.6%, Sweden 13.3%, Iran 8.9%, South Africa 6.7%, Others 55.6%.
